# Supplementary material
Source: ML conference proceedings conference paper supplement (https://openreview.net/forum?id=EDHQDsqiSe)
Supplement: supplementary_material [file attachment]

# Nonadditive Equations

## Observational MMD

MMD

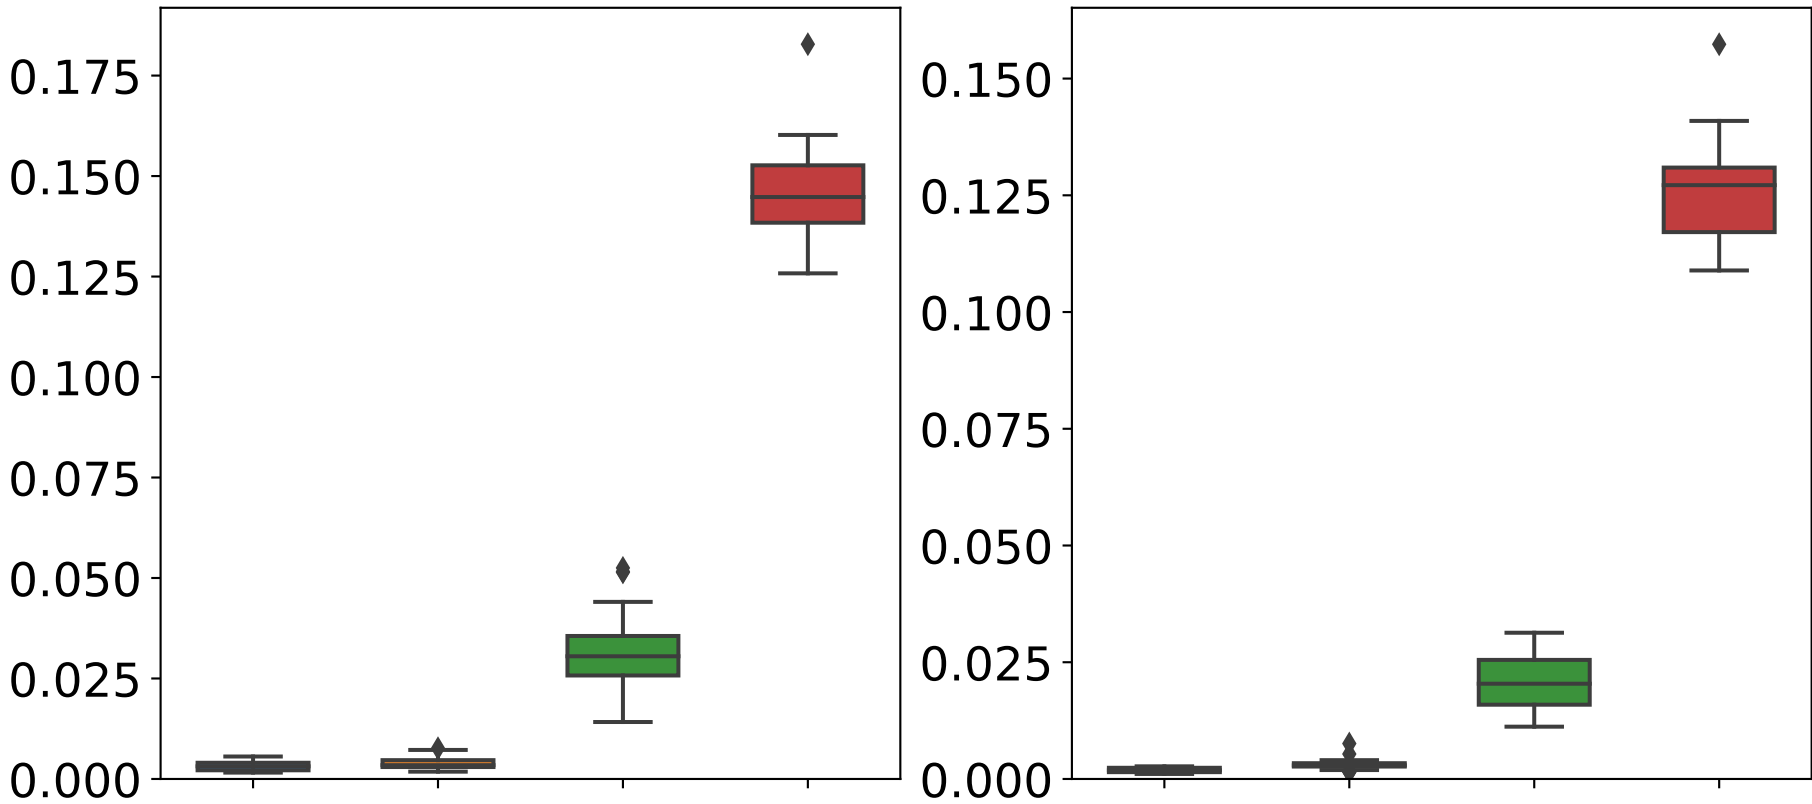

## Interventional MMD

MMD

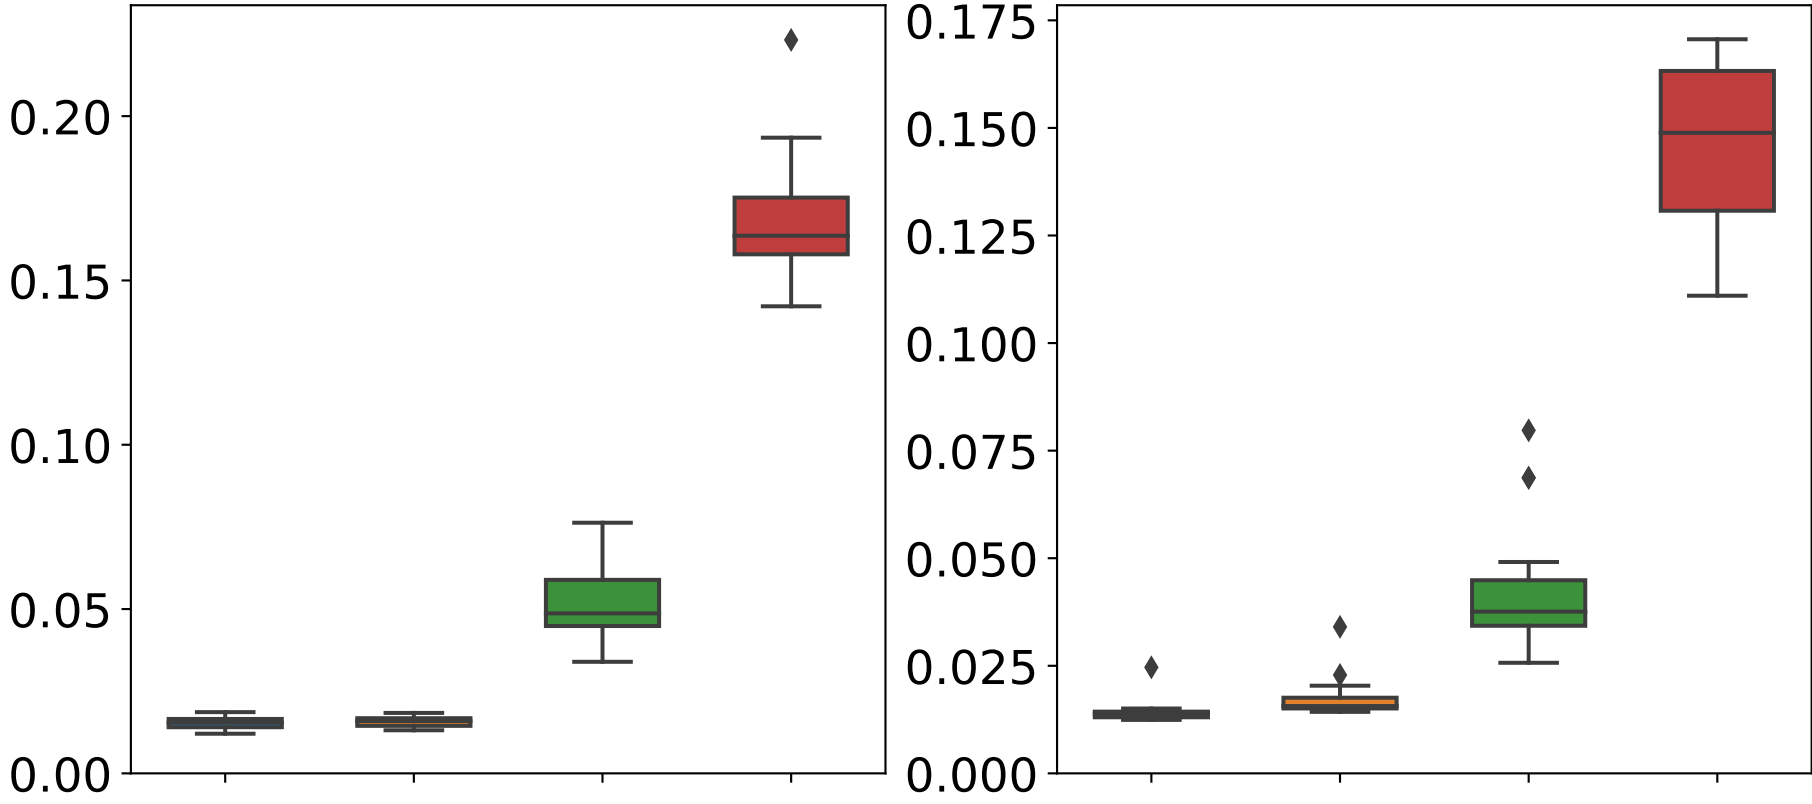

## Counterfactual MSE

MSE

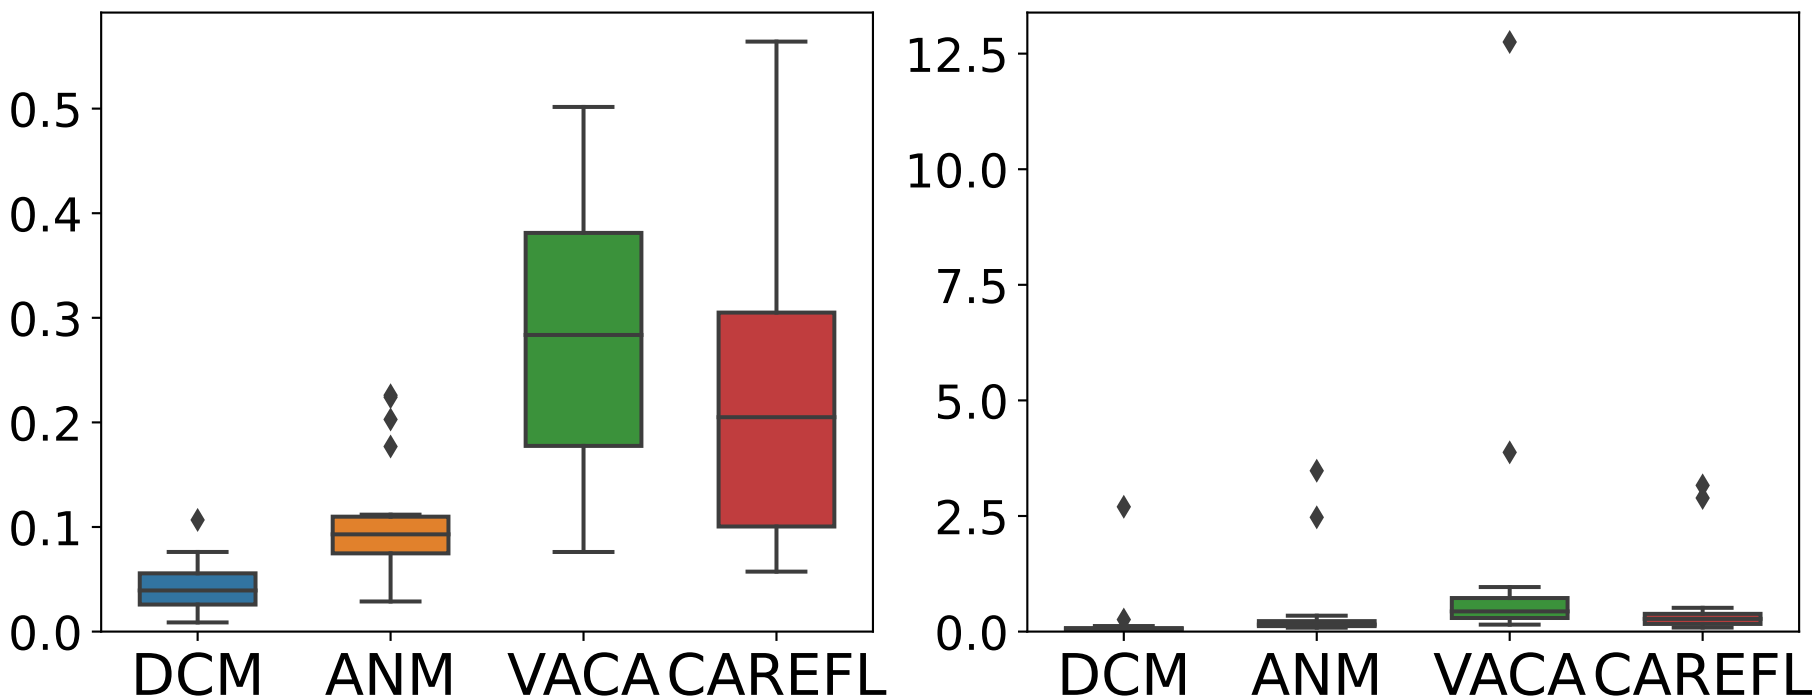

Ladder

Random
