# Supplementary material
Source: ML conference proceedings conference paper supplement (https://openreview.net/forum?id=EDHQDsqiSe)

# Nonlinear Equations

## Observational MMD

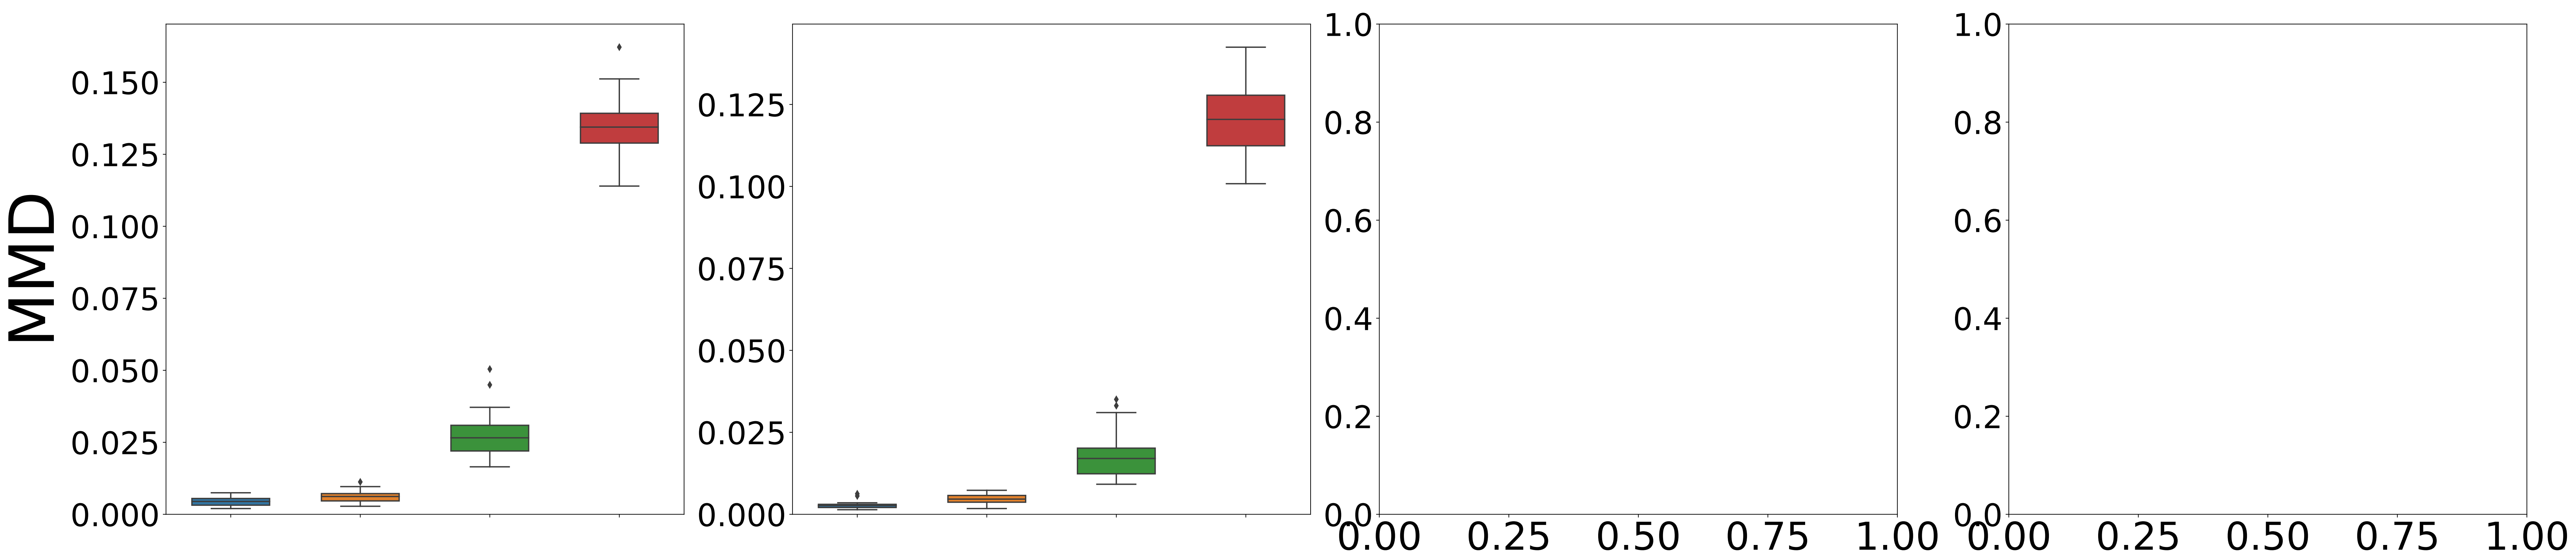

## Interventional MMD

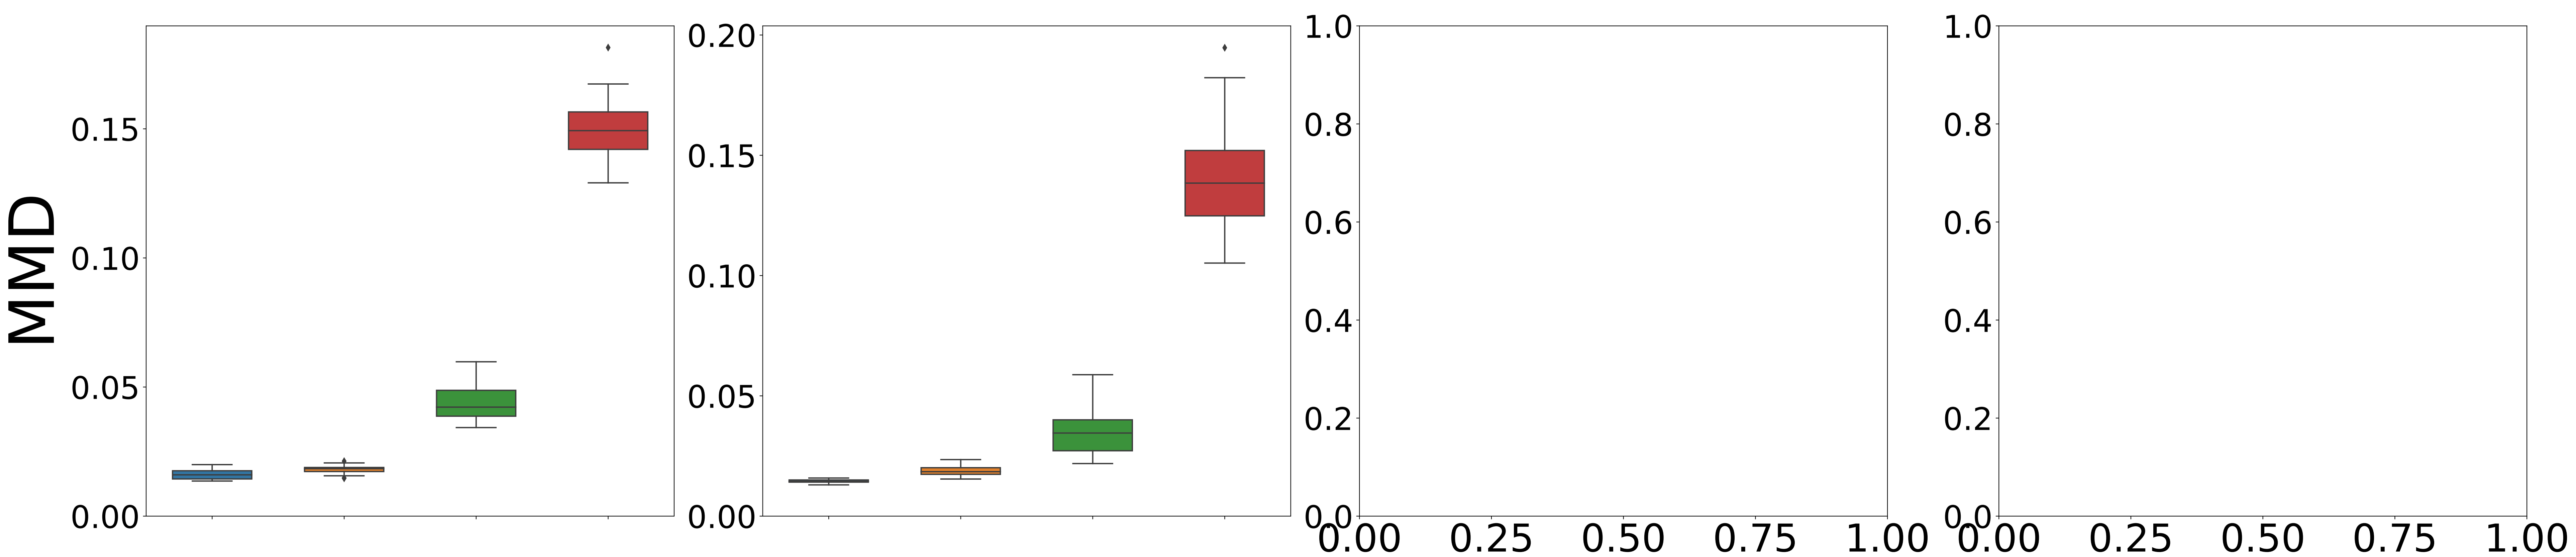

## Counterfactual MSE

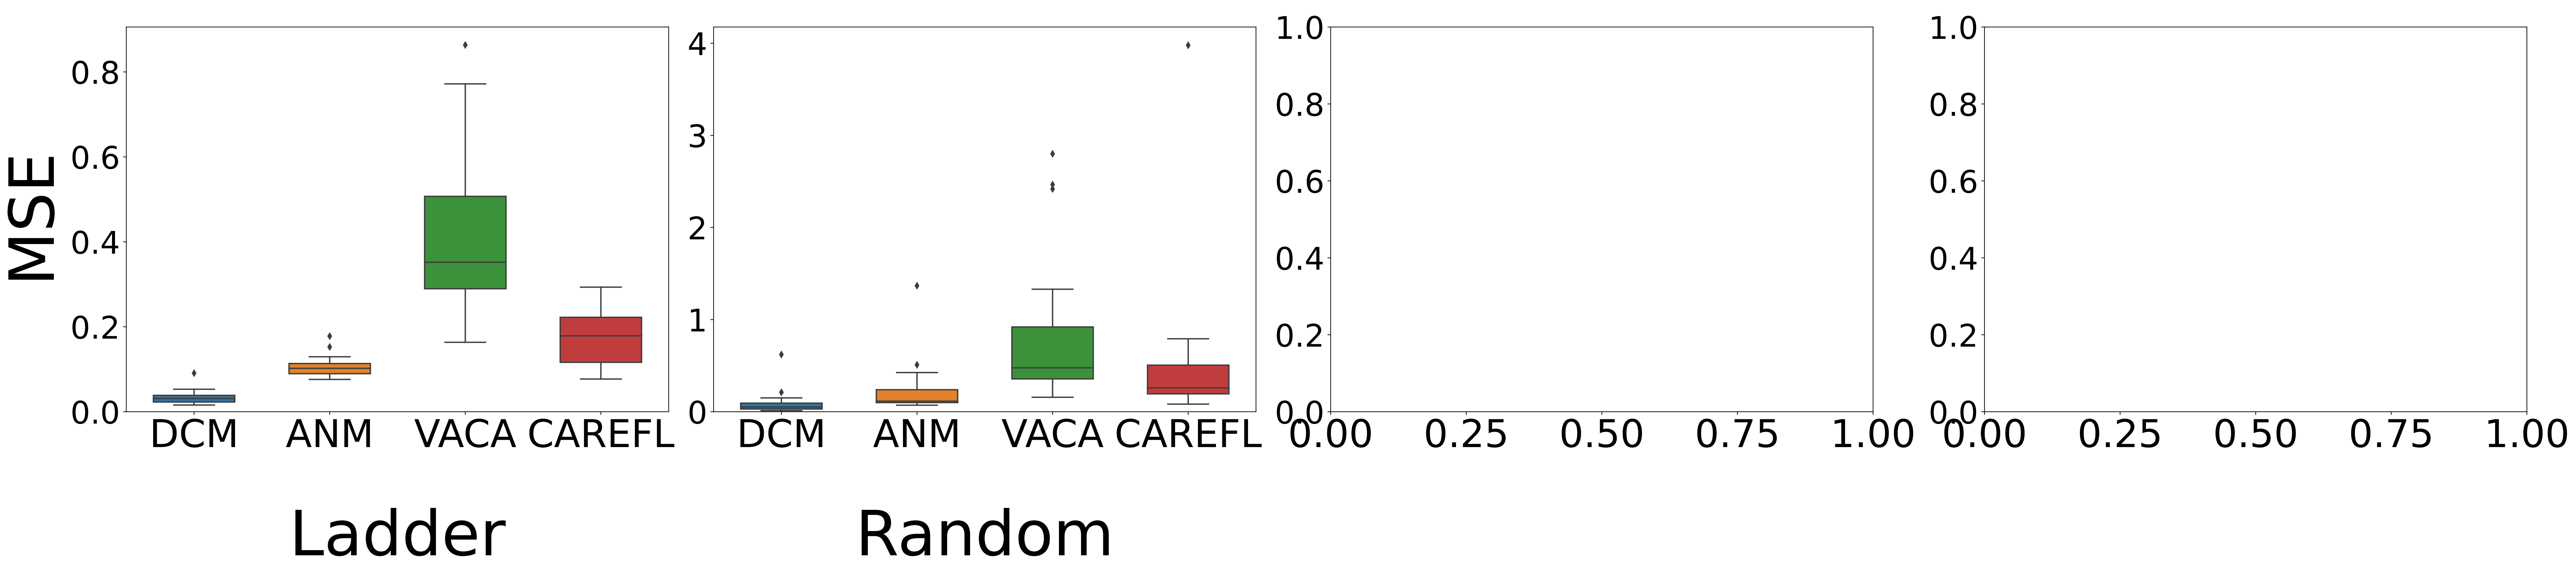

Supplement: supplementary_material [file attachment]

# Nonadditive Equations

## Observational MMD

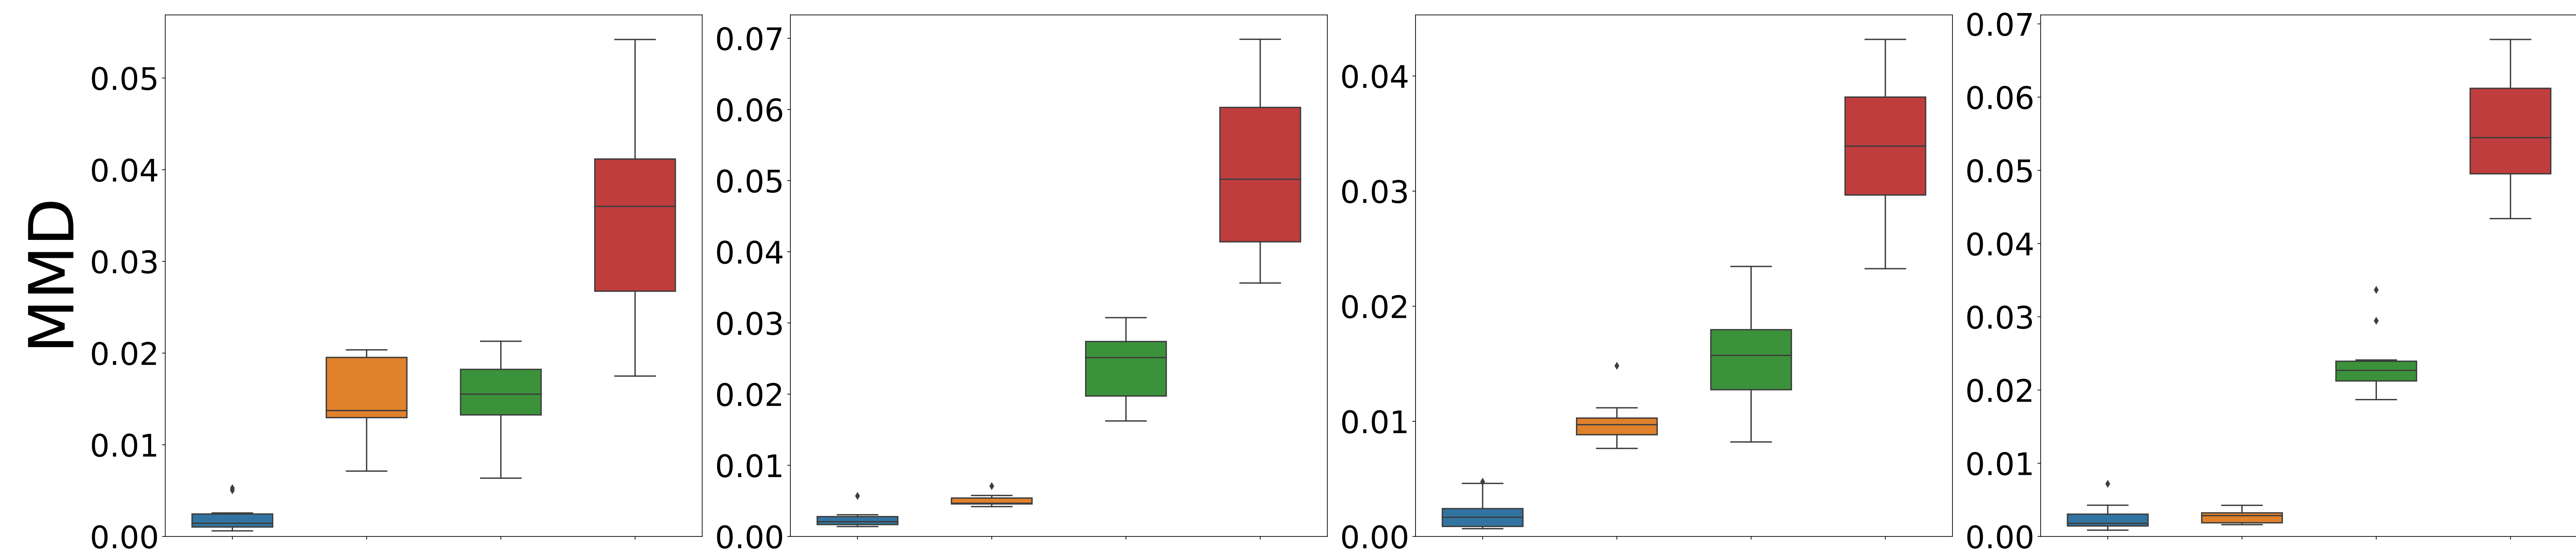

## Interventional MMD

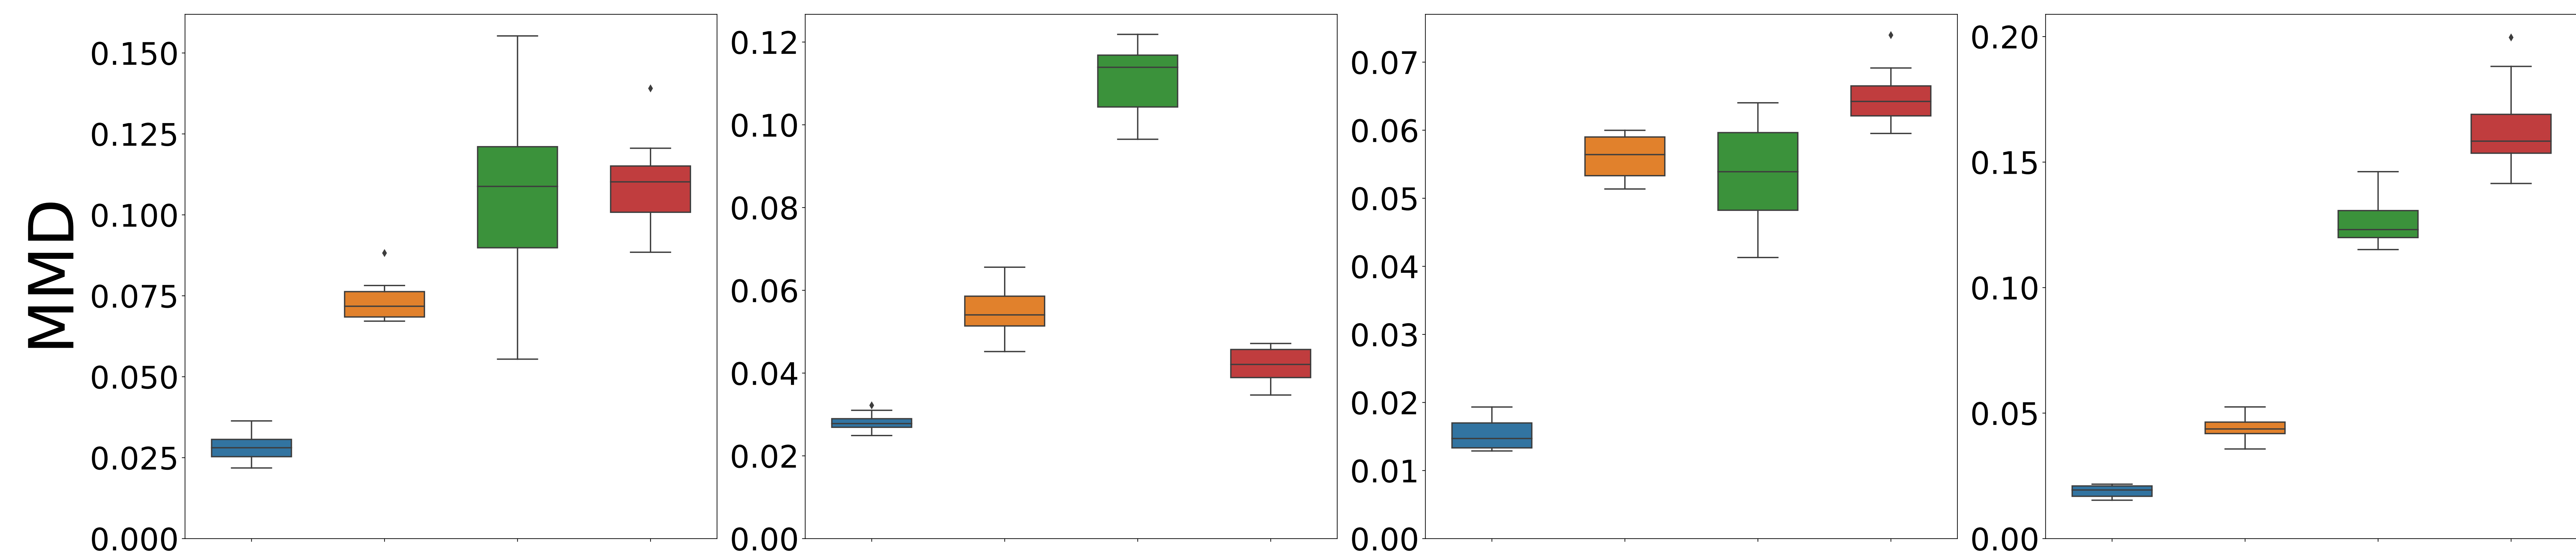

## Counterfactual MSE

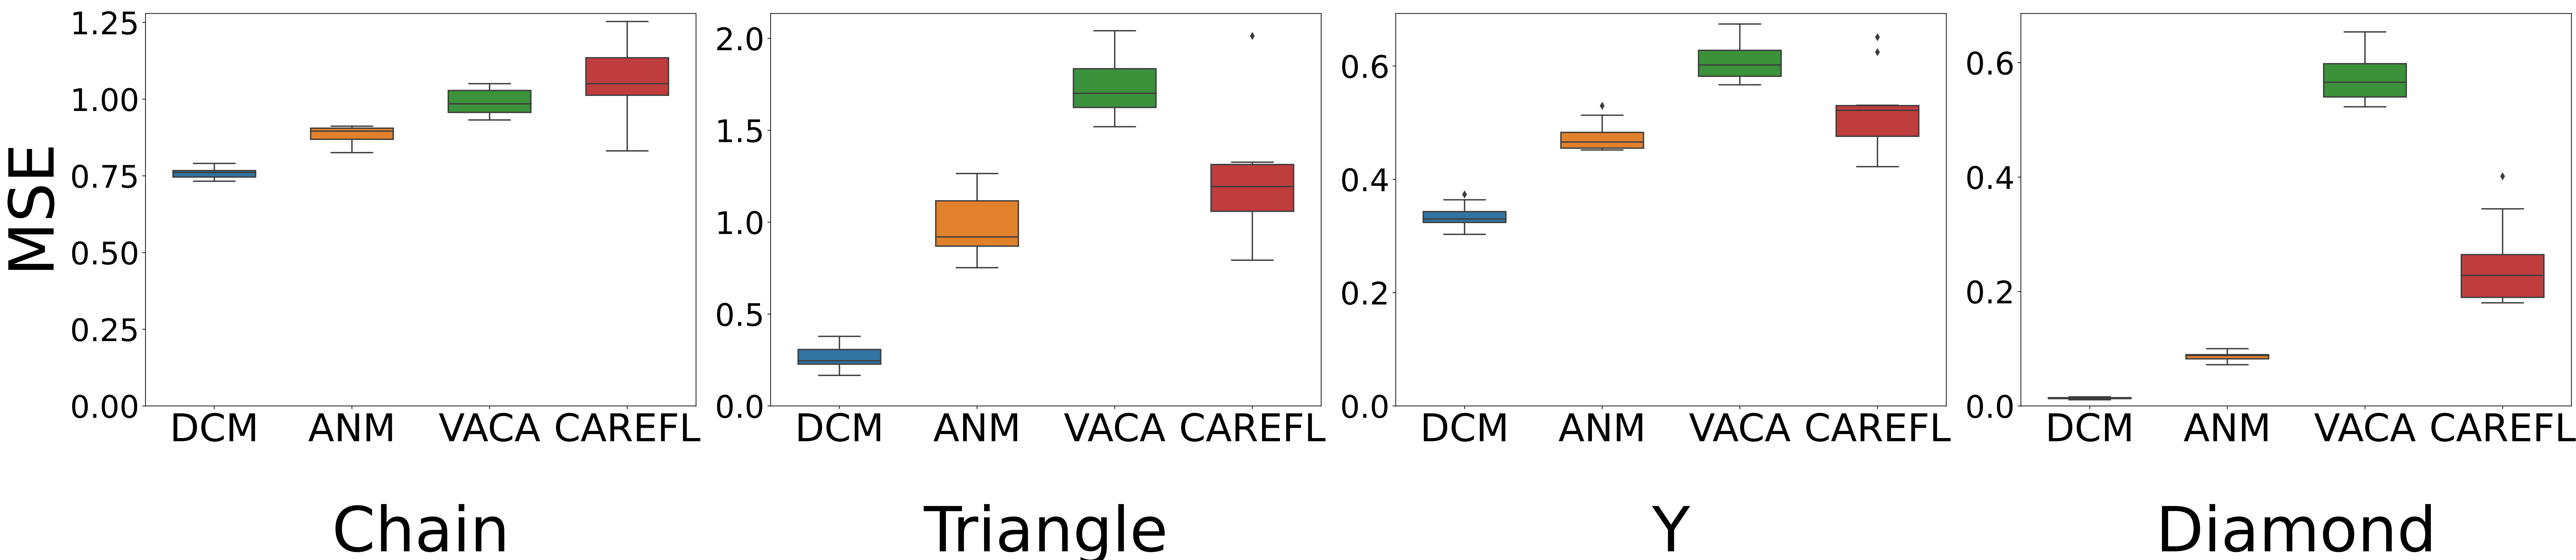

Supplement: supplementary_material [file attachment]

# Nonlinear Equations

## Observational MMD

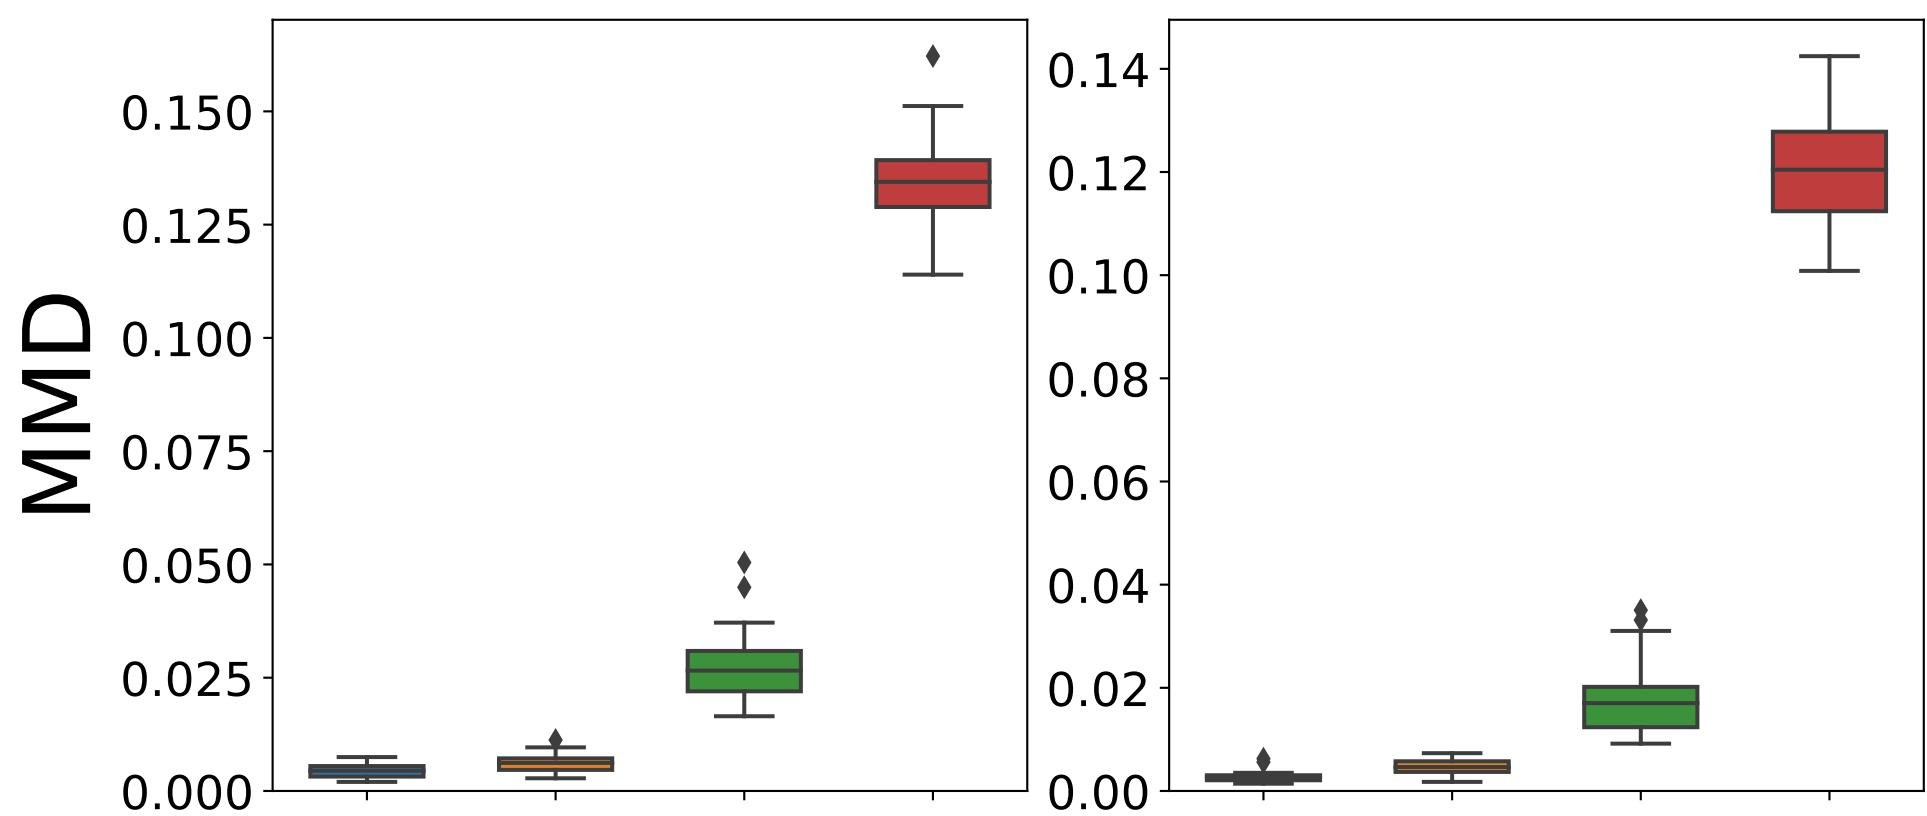

## Interventional MMD

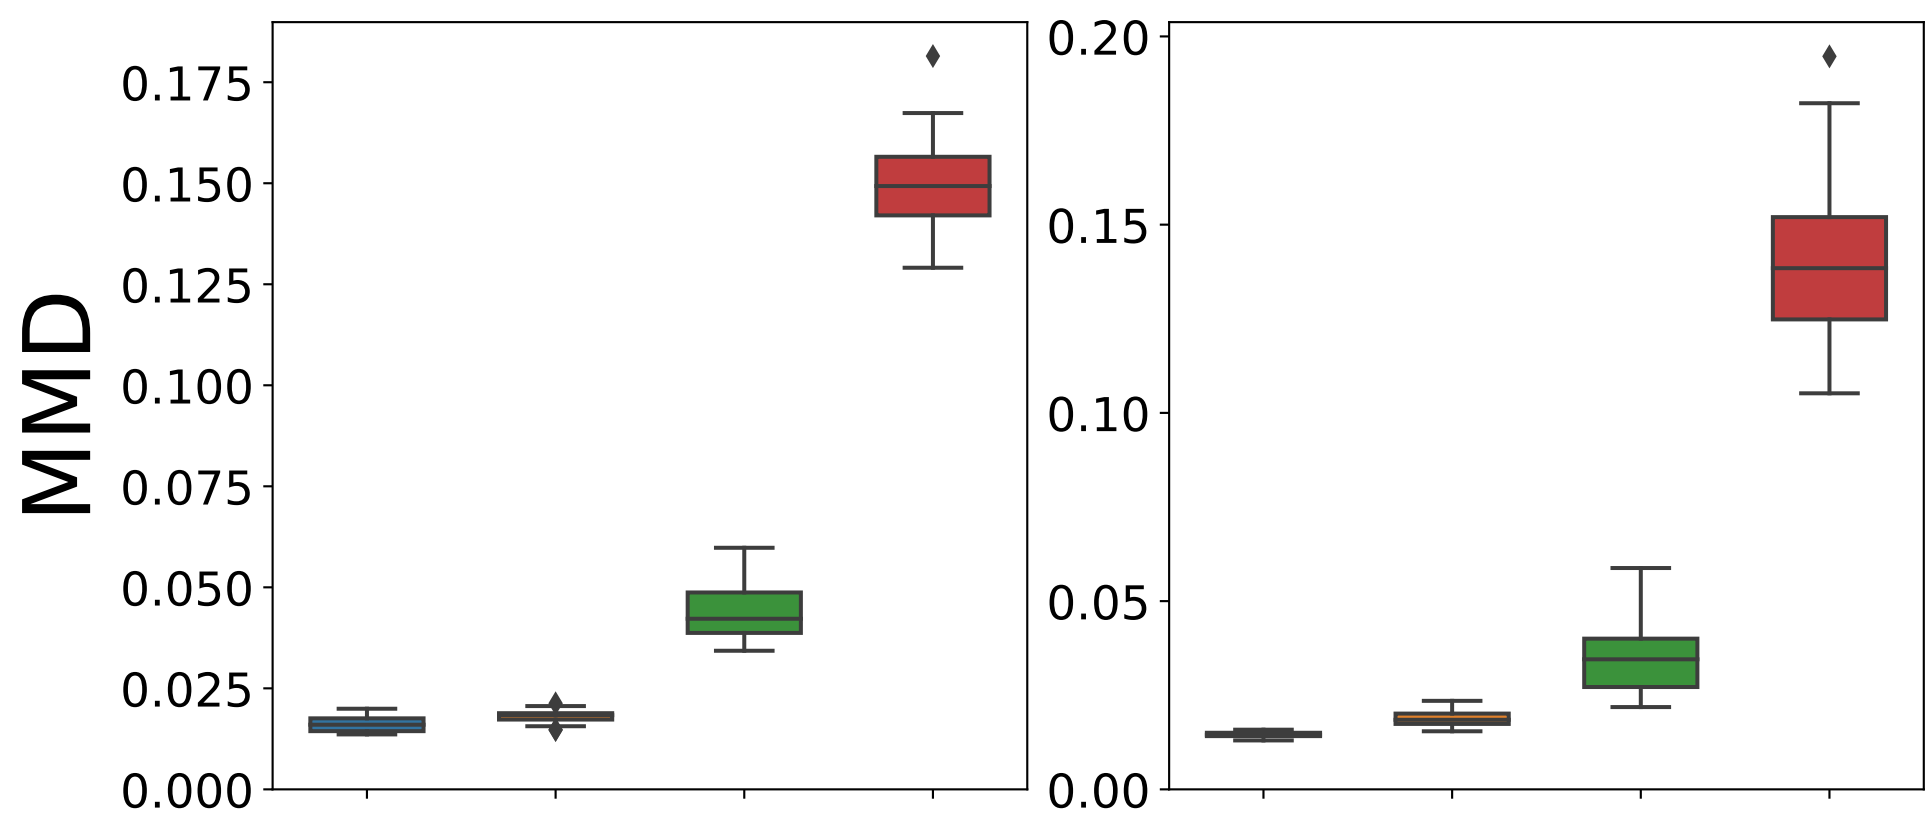

## Counterfactual MSE

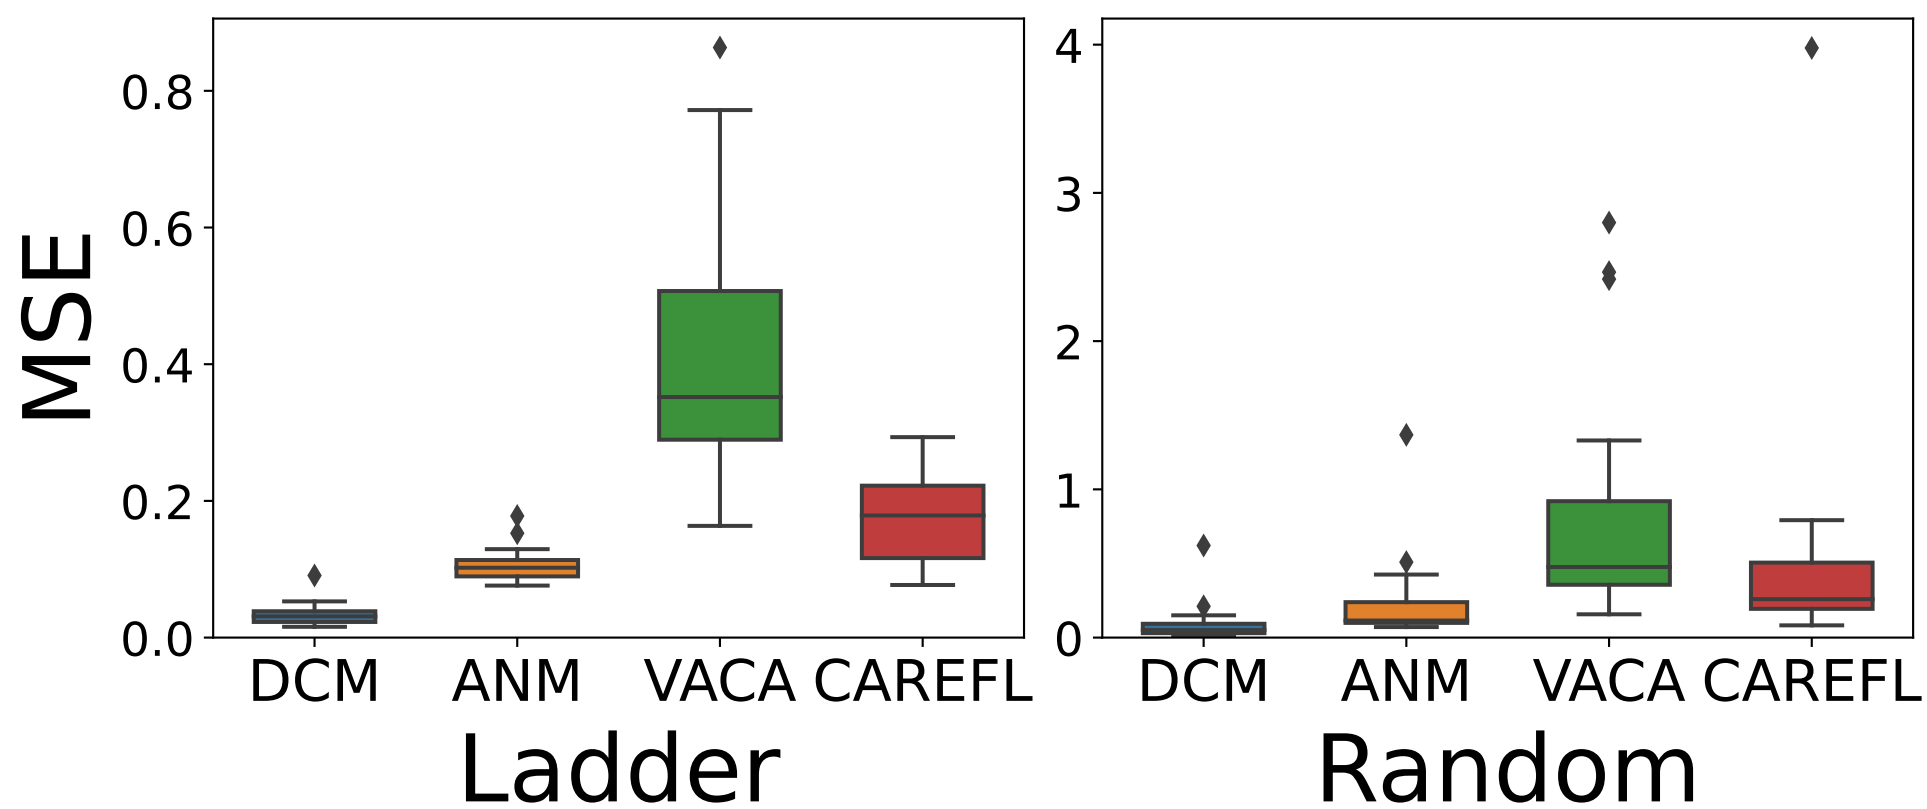

Supplement: supplementary_material [file attachment]
